## Identification and Characterization of an Intracellular Lectin, Calnexin, from *Aspergillus oryzae* Using *N*-Glycan-Conjugated Beads

Taisuke WATANABE,<sup>1,2</sup> Ichiro MATSUO,<sup>1,2</sup> Jun-ichi MARUYAMA,<sup>3</sup>  
Katsuhiko KITAMOTO,<sup>3</sup> and Yukishige ITO<sup>1,2,†</sup>

<sup>1</sup>RIKEN (The Institute of Physical and Chemical Research), 2-1 Hirosawa, Wako-shi, Saitama 351-0198, Japan

<sup>2</sup>CREST (Core Research for Evolutional Science and Technology), JST (Japan Science and Technology Agency), Kawaguchi, Saitama 332-1102, Japan

<sup>3</sup>Department of Biotechnology, The University of Tokyo, 1-1-1 Yayoi, Bunkyo-ku, Tokyo 113-8657, Japan

Received May 14, 2007; Accepted July 27, 2007; Online Publication, November 7, 2007

[doi:10.1271/bbb.70289]

Recently, asparagine-linked oligosaccharides (*N*-glycans) have been found to play a pivotal role in glycoprotein quality control in the endoplasmic reticulum (ER). In order to screen proteins interacting with *N*-glycans, we developed affinity chromatography by conjugating synthetic *N*-glycans on sepharose beads. Using the affinity beads with the dodecasaccharide Glc<sub>1</sub>Man<sub>9</sub>GlcNAc<sub>2</sub>, one structure of the *N*-glycans, a 75-kDa protein, was isolated from the membranous fraction including the ER in *Aspergillus oryzae*. By LC-MS/MS analysis using the *A. oryzae* genome database, the protein was identified as one (AO090009000313) sharing similarities with calnexin. Further affinity chromatographic experiments suggested that the protein specifically bound to Glc<sub>1</sub>Man<sub>9</sub>GlcNAc<sub>2</sub>, similarly to mammalian calnexins. We designated the gene *AoclxA* and expressed it as a fusion gene with *egfp*, revealing the ER localization of the *AoclxA* protein. Our results suggest that our affinity chromatography with synthetic *N*-glycans might help in biological analysis of glycoprotein quality control in the ER.

**Key words:** *N*-glycan; quality control; *Aspergillus oryzae*; calnexin; lectin

*Aspergillus oryzae* is a filamentous fungus used in traditional Japanese fermentation industries. Due to its safety and ability to secrete large amounts of proteins, *A. oryzae* is exploited in the industrial production of proteins.<sup>1</sup> The production level of proteins from higher eukaryotes, however, is markedly lower than that of fungal proteins.<sup>2–4</sup>

Endoplasmic reticulum (ER) quality control is assumed to be one of the bottlenecks limiting the production level of heterologous proteins. Newly synthesized proteins are translocated into the ER, where *N*-

glycans are introduced to asparagine residues of nascent polypeptides. ER-resident chaperones and foldases help the proteins to fold correctly. In mammals and yeast, recently, *N*-glycans have been shown to play a key role in glycoprotein quality control, including protein folding, transportation, and degradation.<sup>5</sup> The calnexin/calreticulin-glucosyltransferase cycle plays a central role in glycoprotein quality control.<sup>5,6</sup> Calnexin and its soluble homolog, calreticulin, are lectin chaperones that share similar specificities to monoglucosylated *N*-glycans, such as Glc<sub>1</sub>Man<sub>9</sub>GlcNAc<sub>2</sub>.<sup>7</sup> They assist in the folding of glycoproteins by recruiting the protein disulfide isomerase-like protein ERp57.<sup>8</sup> When protein folding is incomplete, UDP-glucose:glycoprotein glucosyltransferase (UGGT) glucosylates Man<sub>9</sub>GlcNAc<sub>2</sub> to Glc<sub>1</sub>Man<sub>9</sub>GlcNAc<sub>2</sub>, the calnexin/calreticulin ligand.<sup>9</sup> Misfolded glycoproteins are trapped by MLP (mannosidase-like proteins such as EDEM and Htm1p in mammals and yeast respectively) and, transported to the cytosol.<sup>10,11</sup> Likewise, Yos9p in yeast, a lectin-like protein involved in the degradation of misfolded glycoproteins, is thought to recognize the *N*-glycan structure.<sup>12</sup> Nevertheless, the lectin activities and substrate specificities of these lectin-like proteins involved in glycoprotein degradation are yet to be accurately identified.

For precise understanding of the glycoprotein quality control system, an *N*-glycan with a homogeneous structure is required, but it is difficult to extract the homogeneous structure of the *N*-glycan from natural sources consisting of various structures of *N*-glycans. We comprehensively synthesized *N*-glycans associated with the glycoprotein quality control system in the ER.<sup>13–16</sup> We discovered that synthesized *N*-glycans-methotrexate conjugates can be accepted as a substrate of UGGT.<sup>17</sup> Moreover, employment of these synthetic

<sup>†</sup> To whom correspondence should be addressed. RIKEN (The Institute of Physical and Chemical Research), 2-1 Hirosawa, Wako-shi, Saitama 351-0198, Japan; Fax: +81-48-462-4680; E-mail: yukito@riken.jp

oligosaccharide probes enabled us to evaluate the activity of glucosidase II<sup>18</sup>) and UGGT quantitatively.<sup>17</sup>

Genes related to glycoprotein quality control in the ER are conserved in the *A. oryzae* genome sequence (DOGAN: Database of the Genomes Analyzed at NITE; <http://www.bio.nite.go.jp/dogan/Top>). Recently, it was suggested that glycoprotein quality control is relevant to protein production efficiency by filamentous fungi,<sup>19,20</sup> but the molecular interactions between *N*-glycans and their recognizing proteins have not been studied in filamentous fungi. In this paper, we report the preparation of beads conjugated with synthetic *N*-glycans and the isolation of an *A. oryzae* protein showing a homology to calnexin, its binding specificity and subcellular localization were determined for the first time in filamentous fungi.

## Materials and Methods

**Synthesis of *N*-glycan-conjugated beads.** One hundred milligrams of thiopropyl sepharose 6B (GE Healthcare Bio-Sciences, Little Chalfont, UK) were treated with 500  $\mu$ l of 100 mM Tris (2-carboxyethyl) phosphine (TCEP) for 10 min at room temperature 3 times, and then washed with 10 mM potassium phosphate buffer (KPB) (pH 7.4). The reduced thiopropyl sepharose 6B was treated with 1 mg of iodoacetamidyl *N*-glycan<sup>21</sup>) (Glc<sub>1</sub>Man<sub>9</sub>GlcNAc<sub>2</sub>, Man<sub>9</sub>GlcNAc<sub>2</sub>, and GlcNAc<sub>2</sub>) in 500  $\mu$ l of 10 mM KPB at 4 °C. After removal of the supernatant, the introduction rate of *N*-glycan to thiopropyl sepharose 6B was calculated by quantification of the thiol group concentration using Ellman's reagent (introduction rate of Man<sub>9</sub>GlcNAc<sub>2</sub>, 16%, theoretical value, 12%).<sup>22</sup> The gel was treated with 500  $\mu$ l of 100 mM TCEP 3 times for 10 min at room temperature. It was incubated with 100 mM iodoacetamide overnight at room temperature and washed with 25 mM Tris-HCl (pH 7.0) containing 1% Triton X-100 and 10 mM CaCl<sub>2</sub>. Negative control (NC) beads were prepared by treatment with iodoacetamide to thiopropyl sepharose 6B.

**Preparation of a membranous fraction from *A. oryzae*.** The *A. oryzae* RIB40 (ATCC42149) strain was used for preparation of the membranous fraction. It was grown in DPY medium (2% dextrin, 1% polypeptone, 0.5% yeast extract, 0.5% KH<sub>2</sub>PO<sub>4</sub>, and 0.05% MgSO<sub>4</sub>·7H<sub>2</sub>O) at 30 °C for 18–20 h. Mycelia were homogenized in liquid nitrogen and suspended in extraction buffer (10 mM Tris-HCl, 50 mM NaCl, 10 mM CaCl<sub>2</sub>, and protease inhibitor cocktail, pH 7.5, Roche, Penzberg, Germany). The suspension of cell-free extracts was centrifuged at 3,000  $\times g$  for 10 min at 4 °C, and the supernatant was centrifuged at 25,000  $\times g$  for 20 min at 4 °C. The pellet was resuspended in extraction buffer including 0.5% Triton X-100, and then this solution was centrifuged at 25,000  $\times g$  for 20 min at 4 °C. This supernatant was used as a membranous fraction for the subsequent chromatographic experiment.

**Screening for proteins interacting with *N*-glycan by affinity chromatography.** Approximately 100  $\mu$ g of solubilized membranous protein were applied to a column with 100 mg Glc<sub>1</sub>Man<sub>9</sub>GlcNAc<sub>2</sub>-conjugated beads equilibrated with a binding buffer (25 mM Tris-HCl (pH 7.5), 1% Triton X-100, and 10 mM CaCl<sub>2</sub>) containing 0.2 mM 1-deoxynojirimycin, 0.2 mM 1-deoxymannojirimycin, and 5% Block Ace (Snow Brand Milk Products, Sapporo, Japan), and then incubated for 30 min at 4 °C. The beads were washed with 4 ml of the binding buffer. After washing with 2 ml of binding buffer containing 100 mM NaCl, elution was conducted with 2 ml of an elution buffer (0.1 M Tris-H<sub>2</sub>SO<sub>4</sub> (pH 7.5), 10 mM EDTA, and 5 M guanidine hydrochloride).

**LC-MS/MS analysis.** The fractions in affinity chromatography were analyzed by SDS-PAGE and stained with Coomassie Brilliant Blue. The bands were subjected to in-gel digestion with 12.5 ng/ $\mu$ l trypsin, as described previously.<sup>23</sup>

The resulting mixture was analyzed by LTQ (Thermo Electron, Waltham, MA) liquid chromatography/linear ion trap mass spectrometry (LC-MS/MS) system, and their corresponding proteins were searched using the program Mascot database-searching software (Matrix Science, London, UK),<sup>24</sup> which accesses protein identification by matching mass spectroscopy data with protein databases, NCBI (<http://www.ncbi.nlm.nih.gov>), DOGAN (*A. oryzae* genomes database), and Swiss Prot (<http://us.expasy.org>).

***N*-Glycan binding analysis of the AoClxA protein.** Approximately 1 mg of solubilized membranous protein was applied to a column with Glc<sub>1</sub>Man<sub>9</sub>GlcNAc<sub>2</sub>-conjugated beads equilibrated with 25 mM Tris-HCl (pH 7.5) containing 1% Triton X-100, 0.2 mM 1-deoxynojirimycin, 0.2 mM 1-deoxymannojirimycin, 10 mM CaCl<sub>2</sub>, and 5% Block Ace, and then incubated for 30 min at 4 °C. Washing was done with 1.5 ml of the binding buffer. Then the fraction containing the AoClxA protein was obtained by elution with 4 ml of the binding buffer, and concentrated by filtration to approximately 800  $\mu$ l.

Two hundred  $\mu$ l of the concentrated fraction was applied to Glc<sub>1</sub>Man<sub>9</sub>GlcNAc<sub>2</sub>, Man<sub>9</sub>GlcNAc<sub>2</sub>, GlcNAc<sub>2</sub>, and the NC beads. Washing was done with 500  $\mu$ l of the binding buffer. Elution was done with 4.5 ml of binding buffer. These fractions were analyzed by SDS-PAGE.

**Cloning of the AoClxA gene and construction of the egfp-fused gene.** Primers AoClxA-F and AoClxA-R (5'-GGGGACAAGTTTGTACAAAAAGCAGGCTATGCGTTTCAACGCAGCTGTTGC-3' and 5'-GGGGACCACTTTGTACAAGAAAGCTGGGTAAGTGGGCAG-AAGAACGGGTG-3' respectively, attB sequences required for the MultiSite Gateway™ system are under-

lined) were used to clone the 1.9-kb *AoclxA* ORF from *A. oryzae* genomic DNA. The pgACAE plasmid (Fig. 5A) for expression of the AoClxA-EGFP fusion protein was constructed by the Multisite Gateway™ system.<sup>25)</sup> pgACAE carries a 0.6-kb *amyB* promoter followed by a 1.9-kb *AoclxA* ORF, 0.7-kb *egfp*, 0.2-kb *amyB* terminator, and 5.1-kb *niaD* marker.

**Localization analysis of the AoClxA protein.** *A. oryzae* NS4 (*niaD*<sup>-</sup> *sC*<sup>-</sup>)<sup>26)</sup> was transformed with pgACAE employing the standard transformation method,<sup>1)</sup> which generated ClxE strains. Czapek-Dox (CD) medium (0.3% NaNO<sub>3</sub>, 0.2% KCl, 0.1% KH<sub>2</sub>PO<sub>4</sub>, 0.05% MgSO<sub>4</sub>·7H<sub>2</sub>O, 0.002% FeSO<sub>4</sub>·7H<sub>2</sub>O, 2% glucose, pH 5.5) was used for cultivation of the ClxE strain. Approximately 3.0 × 10<sup>5</sup> of conidia were inoculated in 100 μl of CD medium in glass based dishes (Asahi Techno Glass, Chiba, Japan) and grown at 30 °C for 19 h. ER-Tracker Blue-White DPX (Molecular Probes, Eugene, OR) staining was performed as follows: The media in cultures on cover slips were replaced with CD medium containing 1 μM ER-Tracker Blue-White DPX, and the cultures were incubated for 30 min at 37 °C. Subsequently, the cultures were washed twice with CD media. They were further incubated at 30 °C for 30 min, followed by microscopic analysis with an Olympus System microscope model BX52 (Olympus, Tokyo). A GFP filter (495/20 nm excitation, 510 nm dichroic, 530/35 nm emission) (Chroma Technologies, Brattleboro, VT) was used for observation of EGFP fluorescence. A BH-DMU (330 to 385 nm excitation, 400 nm dichroic, >420 nm emission) UV excitation cube (Olympus) was used to observe the fluorescence of ER-Tracker Blue-White DPX. Images were analyzed with MetaMorph software (Molecular Devices, Sunnyvale, CA).

## Results

### Preparation of N-glycan-conjugated beads

For screening of proteins interacting with N-glycans, we prepared sepharose beads conjugated with N-glycans. First, sepharose beads were conjugated with synthetic Glc<sub>1</sub>Man<sub>9</sub>GlcNAc<sub>2</sub>, one of the processed structures derived from an N-glycan (Glc<sub>3</sub>Man<sub>9</sub>GlcNAc<sub>2</sub>) and recognized by lectin-like chaperones in the ER (*viz.*, calnexin and calreticulin).<sup>27)</sup> Iodoacetamidyl sugar derivatives were prepared as in our previous report.<sup>21)</sup> Iodoacetamidyl Glc<sub>1</sub>Man<sub>9</sub>GlcNAc<sub>2</sub> was introduced to reduced thiopropyl sepharose by alkylation of thiol groups. The rest of the thiol group was capped with iodoacetamide. In order to perform the binding assay, we prepared Man<sub>9</sub>GlcNAc<sub>2</sub>, GlcNAc<sub>2</sub> beads too. Amido beads were used as a negative control.

### Screening for proteins interacting with the N-glycan

In order to find a membranous fraction including the ER, the *A. oryzae* strain expressing BipA-EGFP fusion protein was used. The BipA-EGFP fusion protein was

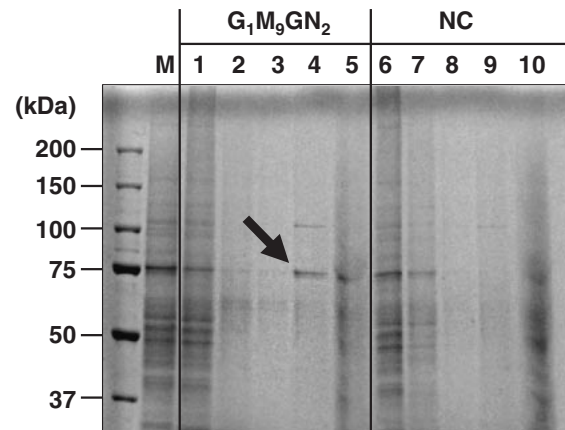

**Fig. 1.** Affinity Chromatography with Glc<sub>1</sub>Man<sub>9</sub>GlcNAc<sub>2</sub>-Conjugated Beads for the Interacting Protein from *A. oryzae* Membranous Fraction.

Lanes: M, membranous fraction from *A. oryzae*; 1 and 6, wash fractions with the binding buffer; 2, 3, 7, and 8, wash fractions with binding buffer containing 100 mM NaCl; 4, 5, 9, and 10, elution fractions with 5 M guanidine solution. Arrow indicates the 75-kDa protein isolated by the Glc<sub>1</sub>Man<sub>9</sub>GlcNAc<sub>2</sub>-conjugated beads. G<sub>1</sub>M<sub>9</sub>GN<sub>2</sub>, Glc<sub>1</sub>Man<sub>9</sub>GlcNAc<sub>2</sub>-conjugated beads; NC, negative control (non-conjugated beads).

found to localize in the ER.<sup>28)</sup> Cell lysate of the strain was subjected to differential centrifugation. Western blot analysis using anti-GFP antibody revealed that the BipA-EGFP fusion protein abundantly resided in the 25,000 × *g* pellet fraction (data not shown). Hence, a 25,000 × *g* pellet from the *A. oryzae* wild-type strain RIB40 was used as a membranous fraction in the subsequent experiments. This fraction also showed ER glucosidase II activity,<sup>29)</sup> suggesting that it contained whole sets of the enzymes and lectins related to glycoprotein quality control in the ER.

Next we screened proteins showing binding affinity to the N-glycan from the membranous fraction of *A. oryzae*. The membranous fraction was solubilized by the addition of a detergent (1% Triton X-100), and incubated with Glc<sub>1</sub>Man<sub>9</sub>GlcNAc<sub>2</sub>-conjugated sepharose beads in the presence of 10 mM CaCl<sub>2</sub>. In order to prevent cleavage of N-glycan, the glucosidase inhibitor 1-deoxynojirimycin and the mannosidase inhibitor 1-deoxymannojirimycin were added. After washing with a binding buffer containing 100 mM NaCl, the beads were treated with 5 M guanidine hydrochloride solution for elution, since adequate amounts of the synthetic N-glycan for elution were not available. Figure 1 shows the result of SDS-PAGE analysis of each fraction. An approximately 75-kDa band was detected specifically in the elution fraction from the Glc<sub>1</sub>Man<sub>9</sub>GlcNAc<sub>2</sub>-conjugated beads (lane 4), which was not found in that from the negative control (NC) beads (lane 9). An approximately 100-kDa band was noticed in the elution fractions from both the beads (lanes 4 and 9) and turned out to be translation elongation factor 2 (gi|83769606). The 75-kDa protein was not eluted in similar chromato-

**Table 1.** Mass Spectrometric Identification of Lectin-Like Protein

| Sequence position | Matched sequence                 | Ion score |
|-------------------|----------------------------------|-----------|
| 48–61             | APFLEQFTDDWESR                   | 67        |
| 62–68             | WTPSHAK                          | 19        |
| 69–93             | KDDSQTEEDWAYVGEWSVEEPTVFK        | 57        |
| 70–93             | DDSQTEEDWAYVGEWSVEEPTVFK         | 51        |
| 94–99             | GIDGDK                           | 17        |
| 105–115           | NPAAHHAISAK                      | 25        |
| 119–123           | KIDNK                            | 22        |
| 126–147           | TLVQYEVKPKQNSLVCGGAYLK           | 44        |
| 154–174           | KLHAEFEFSNATPYVIMFGPDK           | 71        |
| 155–174           | LHAEFEFSNATPYVIMFGPDK            | 109       |
| 181–186           | VHFIFR                           | 30        |
| 192–198           | TGEYEEK                          | 26        |
| 208–235           | TNKVTSLSYTLIVRPDQSFQILIDGEAVK    | 47        |
| 211–235           | VTSLYTLIVRPDQFQILIDGEAVK         | 74        |
| 236–251           | NGTLLDFNPPVNPKEK                 | 45        |
| 260–269           | KPDDWVDDVK                       | 82        |
| 337–351           | CNDVSGCGPWSAPMK                  | 75        |
| 337–352           | CNDVSGCGPWSAPMCK                 | 28        |
| 360–371           | WTAPMIDNPAYK                     | 34        |
| 372–377           | GPWAPR                           | 19        |
| 378–388           | KIANPAYFEDK                      | 66        |
| 379–388           | IANPAYFEDK                       | 67        |
| 429–435           | KEFDVK                           | 17        |
| 436–449           | HPVEVAEEEEASKPK                  | 67        |
| 450–470           | KEETAPATSVSFQEDPITFVR            | 90        |
| 471–481           | EKVDHFVGLAK                      | 46        |
| 473–481           | VDHFVGLAK                        | 61        |
| 482–489           | QDPVNAVK                         | 30        |
| 490–514           | QAPEVAGTLGALVLSMVLIIVGAIK        | 79        |
| 490–524           | QAPEVAGTLGALVLSMVLIIVAIKASSPAPVK | 58        |
| 515–524           | ASSPAPAPVK                       | 50        |
| 535–549           | EKVSEAVSSSADTGG                  | 72        |
| 537–549           | VSEAVSSSADTGG                    | 77        |

Probability of Based Mowse Scores > 40 indicates identity or extensive homology ( $p < 0.05$ ).

graphic experiments using other subcellular fractions, such as the 100,000 × *g* pellet and supernatant from *A. oryzae* (data not shown).

#### Identification of the 75-kDa protein by LC-MS/MS analysis

For identification of the 75-kDa protein eluted specifically from the Glc<sub>1</sub>Man<sub>9</sub>GlcNAc<sub>2</sub>-conjugated sepharose beads, the band was excised from the SDS-PAGE gel, and in-gel digestion with trypsin was carried out. The resulting peptides were analyzed by LC-MS/MS, and the data for mass and internal amino acid sequences were analyzed using Mascot database-searching software. The 75-kDa protein was identified as *A. oryzae* unnamed protein product (gi|83764647 in DDBJ) and *A. oryzae* calnexin (AO090009000313 in DOGAN: the *A. oryzae* genome database). Thirty three of the predicted tryptic fragments were matched (Table 1), and the sequence coverage of the matched peptides was 59.4% (Fig. 2).

The gene consisted of 1,924 bp, including 5 exons and 4 introns, and was deduced to encode 562 amino acid residues (molecular mass, 61,976 Da) showing similar-

ities in amino acid sequence to calnexins from other organisms, 83.6%; *Aspergillus niger* ClxA (gi|1856-4807), 39.1%; *Homo sapiens* (gi|543920), 39.1%; *Arabidopsis thaliana* (gi|231683), 43.2%; *Schizosaccharomyces pombe* (gi|543923), and 24.5%; *Saccharomyces cerevisiae* (gi|115549) (Fig. 3). Hence, the gene was designated *AoclxA*.

Calnexin has a signal sequence in the N-terminus and one transmembrane domain in the C-terminus.<sup>30–32</sup> The signal peptide in the AoClxA protein was predicted from 1st to 23rd amino acids using the programs SignalP (<http://www.cbs.dtu.dk/services/SignalP/>) and SIGCLEAVE (<http://bioweb.pasteur.fr/seqanal/interfaces/sigcleave.html>) (Fig. 3). A putative transmembrane domain was found between amino acid residues 498 and 515 using the program SOSUI signal ([http://bp.nuap.nagoya-u.ac.jp/sosui/sosuisignal/sosuisignal\\_submit.html](http://bp.nuap.nagoya-u.ac.jp/sosui/sosuisignal/sosuisignal_submit.html)) for prediction of the membrane protein. LC-MS/MS data for the 75-kDa protein included tryptic fragments from the deduced transmembrane domain, but not from the signal peptides (Fig. 2). This implies that the signal peptide of the AoClxA protein was removed by signal peptidase. The lectin sites in calnexin recognize the terminal glucose residue and three underlying mannose residues in the Glc<sub>1</sub>Man<sub>9</sub>GlcNAc<sub>2</sub> oligosaccharide.<sup>33–35</sup> The AoClxA protein has two conserved residues related to lectin sites (Fig. 3). Calnexin and calreticulin bind to calcium with their KPEDWDE-like repeat motif representing high affinity to calcium.<sup>31,32,36</sup> There were four calcium binding motifs (KPEDWDE-like repeats) in the AoClxA protein (Fig. 3). These results indicate that the AoClxA protein contains common features of calnexins from other eukaryotes.

In the *AoclxA* promoter, three CT-rich regions were found near positions [–50, –110, –160 bp] (Fig. 2). CT-rich regions have been identified in the upstream region of the transcriptional start points in many fungal genes, including *A. niger clxA*.<sup>32,37</sup> The binding sequence, 5'-CAN(G/A)NTGT/GCCT-3', of the HacA protein,<sup>38</sup> a UPR (unfolded protein response) transcription factor, was not present in the *AoclxA* promoter. CreA (a transcriptional repressor in carbon catabolite repression) binding sites are found in the *AoclxA* promoter, as reported for *A. niger clxA* gene.<sup>32</sup>

#### Specific binding of the AoClxA protein to Glc<sub>1</sub>-Man<sub>9</sub>GlcNAc<sub>2</sub>

Although mammalian calnexins bind to Glc<sub>1</sub>Man<sub>9</sub>GlcNAc<sub>2</sub>,<sup>27,33</sup> calnexins from yeast and filamentous fungi have not been studied for their specific binding to Glc<sub>1</sub>Man<sub>9</sub>GlcNAc<sub>2</sub> *in vitro*. We performed a binding assay of the 75-kDa protein (AoClxA) using N-glycan-conjugated beads. For this experiment, Man<sub>9</sub>GlcNAc<sub>2</sub> and GlcNAc<sub>2</sub>-conjugated beads were also prepared. The 75-kDa protein was eluted with a large volume of the binding buffer from the Glc<sub>1</sub>Man<sub>9</sub>GlcNAc<sub>2</sub>-conjugated beads incubated with the membranous fraction. After the

```

tatttatattcatttgaatttaccattgactggattgaattgtcttatttgaattgggtgactagcatgttgggagaagtgtactaatatgaatgaatggatgggactacaataa -421
catacaggagcctaacgctgacacccaagagagaaaaaagcaataaaacgggtctcttagaataatggacactggacagaacatggagaatctgccactaatcctgtctt -301
gggtcggggaaactttaccccaaggggcaagcggcagcgggaagggccagattgaaacttaagctacctccagactcataataaacctcccccaactcgtctctctctctctctctct -181
ctctctctctctctctctctctctctctctctctctctctctctctctctctctctctctctctctctctctctctctctctctctctctctctctctctctctctctctctctct -61
ctctctctctctctctctctctctctctctctctctctctctctctctctctctctctctctctctctctctctctctctctctctctctctctctctctctctctctctctctct 60
ctctctctctctctctctctctctctctctctctctctctctctctctctctctctctctctctctctctctctctctctctctctctctctctctctctctctctctctctctct
M R F N A A V A S A L V S S A T L M G Y
GCTCATGCTGAGGAGCGGAGAAGAACCCCGACGCTACCTCTGTCTGATGAGAAGCAACTTTCACCGtaagttattccccccgggtgttggcgccccctctctgcgcggttgtgtgaca 180
A H A E E A E A E K N P D A T S V V E K P T F T
acgcctagCCTACCACCTCAAAGCTCCTTTCCTCGAGCAATTCACCGATGATTGGGAATCTCGGTGGACCCCATGCCAAGAAGGATGACTCCCAAACCGAAGAGGACTGGGCCT 300
P T T L K A P F L E Q F T D D W E S R W T P S H A K K D D S Q T E E D W A Y
ACGTCGGTGAATGGTCCGTTGAGGAACCCACTGTCTTCAAGGGTATCGACGGAGACAAGGGTCTCGTTGTAAGAACCCTGCCGCCACCATGCTATCTCGGGAAATTCCTTAAGAAGA 420
V G E W S V E E P T V F K G I D G D K G L V V K N P A A H H A I S A K F P K K I
TTGATAACAAGGCAAGACCTGGTTGTTTCAGTATGAGGTCAAGCCGACAGtaagcttggctccacacagctgttaaacgttcagtgctataatacattcttggtagACTCCCTCGTT 540
D N K G K T L V V Q Y E V K P Q N
TGCGGTGGCCCTACTCAAGCTCTCCAGGAAACAAGAAGCTCCACGCCGAGGAGTCTCTAACGCCACCCCTTATGTTATCATGTTTCGGCCCGACAAGTGGCGTGTACCAACAAG 660
C G G A Y L R K L L Q E N K K L H A E E F S N A T P Y V I M F G P D K C G A T N K
gtatgttctaggaataacttatacgtcacctctctccagactacgactcatatattatcagTCCATTTTCATCTCCGCCACAAGAACCCTCAAGACTGGCCGAGTACGAGGAGAAGCACT 780
V H F I F R H K N P K T G E Y E E K H L
CAAGGCTCCTCTGTCTGCTCGCACCAACAAGGTCACTTCTTGTACACCTTGATGTCCGTCGCCGACAGTCTTTCAGATCCTCATTGATGGCGAGGCTGTCAAGAAGCGCACCTTGTCT 900
K A P P A A R T N K V T S L Y T L I V R P D Q S F Q I L I D G E A V K N G T L L
TGAGGACTTCAACCTCCTGTCAACCCCGAGAAGGAGATCGATGACCCCAAGGATAAGAAGCCCGACGATGGGTGACGATGTCAAGATTCTGACCCCTGAGGCCACCAAGCCCGAGGA 1020
E D F N P P V N P E K E I D D P K D K K P D D W V D D V K I P D P E A T K P E D
CTGGATGAGGAAGCCCTACGAGATTGTTGACGAGGAAGCCCAAGCCCGAGGATGGCTTGGAGGAGGAGCCACCAGCATCCCGACCCCGAGGCCGAGGAGGCTGAGGACTGGGA 1140
W D E E A P Y E I V D E E A T K P E D W L E E E P T S I P D P E A E K P E D W D
CGATGAGGAGGATGGCGATTGGATTCCCCCACTGTTCCCAACCTAAGTGAATGAGTCTCTGGCTGTGGCCCTGGAGCGCTCCGATGAAGAAGAACCCTGCCCTACAAGGCAAGTG 1260
D E E D G D W I P P T N V P N P K C N D V S G C G P W S A P M K K N P A Y K G K W
GACTGCTCCTATGATCGACAACCCCGCTACAAGGGCCCTGGGCTCCCGCAAGATCGCCAACCCCGCTTACTTTGAAGATAAGACCCCTCCAACCTTTGAGGCTATGGCGCTgttaag 1380
T A P M I D N P A Y K G P W A P R K I A N P A Y F E D K T P S N F E P M G A
tacctcctttaggatgatttggctgtcgtataattaacattccttagATTGGCTTTGAAATCTGGATATGACAGACACATCCTGTTCGACAACATCTACATTGGCCACTCCCCCGA 1500
I G F E I W T M Q N D I L F D N I Y I G H S P E
GGATGCTGAGCAGTCCGCAAGGAGACTTTCGATGTCAAGCACCCCGTTGAGGTTGCCGAGGAGGAGGCTCCAAGCCCAAGAAGGAGGAGACTGCCCTTGCACCAGTGTAGCTTCCA 1620
D A E Q L R K E T F D V K H P V E V A E E A S K P K K E E T A P A T S V S F Q
GGAAGACCCCATCACTTTCCTCGTGAAGAGGTTCGACCACTTGTGGATGCAAGCAGGACCCCGTGAACCCGTTAAGCAAGCTCCTGAGGTTCGCGGTACTTTGGGAGCCCTTGT 1740
E D P I T F V R E K V D H F V G L A K Q D P V N A V K Q A P E V A G T L G A L V
TCTCTGATGTTCTCATCATCGTGGGCGCATCAAGCCAGCAGCCCGCCCTGCCCTGTCAAGAAGGGCAAGGAGACCCGAGGCGCTCCAAGGAGAAGGTGACGAGGCTGTGAG 1860
L S M V L I I V G A I K A S S P A P A P V K K G K E T A G A A K E K V S E A V S
CAGCTCTGCGGACACGGGCAAGGGCGCGCCAGCAAGCGTACCACCCGTTCTTCTGCCAGTAA 1924
S S A D T G K G G A S K R T T R S S A Q *

```

**Fig. 2.** Nucleotide and Deduced Amino Acid Sequences of the *AoclxA* Gene.

Intron and promoter sequences are written in lower case letters. CT-rich regions are underlined. The amino acids sequences matched by LC-MS/MS analysis are shown in bold letters.

non-specifically binding proteins were removed by washing with the binding buffer, the 75-kDa protein was applied to the Glc<sub>1</sub>Man<sub>9</sub>GlcNAc<sub>2</sub>, Man<sub>9</sub>GlcNAc<sub>2</sub>, GlcNAc<sub>2</sub>, and NC beads. The incubated beads were washed, and then the eluted fractions were analyzed by SDS-PAGE (Fig. 4). The 75-kDa protein bound only to the Glc<sub>1</sub>Man<sub>9</sub>GlcNAc<sub>2</sub>-conjugated beads (Fig. 4, lane 2), strongly suggesting that the binding target of the AoClxA protein was Glc<sub>1</sub>Man<sub>9</sub>GlcNAc<sub>2</sub>.

#### Localization analysis of the AoClxA protein

In order to confirm the localization of the 75-kDa protein (AoClxA) isolated from the membranous fraction, the *AoclxA* gene was fused with *egfp* and expressed in *A. oryzae*. In the strain expressing the AoClxA-EGFP fusion protein, EGFP fluorescence was observed as a tubular network containing ring-like structures (Fig. 5). We stained the strain with ER-Tracker Blue-White DPX, an ER-specific dye, resulting in co-localization of the two colors of fluorescence. The results indicated that the AoClxA protein was distributed in the ER. Therefore, it was revealed at the cellular level that the membranous fraction contained the ER with a lectin binding to Glc<sub>1</sub>Man<sub>9</sub>GlcNAc<sub>2</sub>, one structure of the *N*-glycans.

## Discussion

Recently, the function of *N*-glycans in glycoprotein

quality control in the ER has drawn much attention,<sup>5)</sup> but a major obstacle to molecular investigation of them is the difficulty in preparing homogeneous substrates of *N*-glycans. Chemical synthesis of *N*-glycans related to glycoprotein quality control in the ER provides sufficient quantities of homogeneous substrates,<sup>13–16,39)</sup> enabling detailed analysis at the molecular level.<sup>17,18,40)</sup> In this paper, we report the development of *N*-glycan-conjugated beads, and isolation and characterization of a protein interacting with Glc<sub>1</sub>Man<sub>9</sub>GlcNAc<sub>2</sub>.

Although genes related to glycoprotein quality control in the ER are found in the *A. oryzae* genome database, knowledge of their molecular functions is limited. In this study, by employing beads conjugated with synthesized *N*-glycans, we isolated an AoClxA protein interacting with Glc<sub>1</sub>Man<sub>9</sub>GlcNAc<sub>2</sub> from the membranous fraction of *A. oryzae*. Using beads conjugated with other structures, we are attempting to screen proteins binding to various structures of *N*-glycans. LC-MS/MS analysis raised the determination efficiency of unidentified proteins, since it gives information not only on the mass of peptides, but also on internal amino acid sequences. The use of LC-MS/MS should contribute effectively to comprehensive identification of proteins in *A. oryzae*.

We suggest that the AoClxA protein specifically bound to Glc<sub>1</sub>Man<sub>9</sub>GlcNAc<sub>2</sub>, as previously reported for mammalian calnexins.<sup>27,33)</sup> Although in filamentous fungi the calnexin gene (*clxA*) has been cloned from



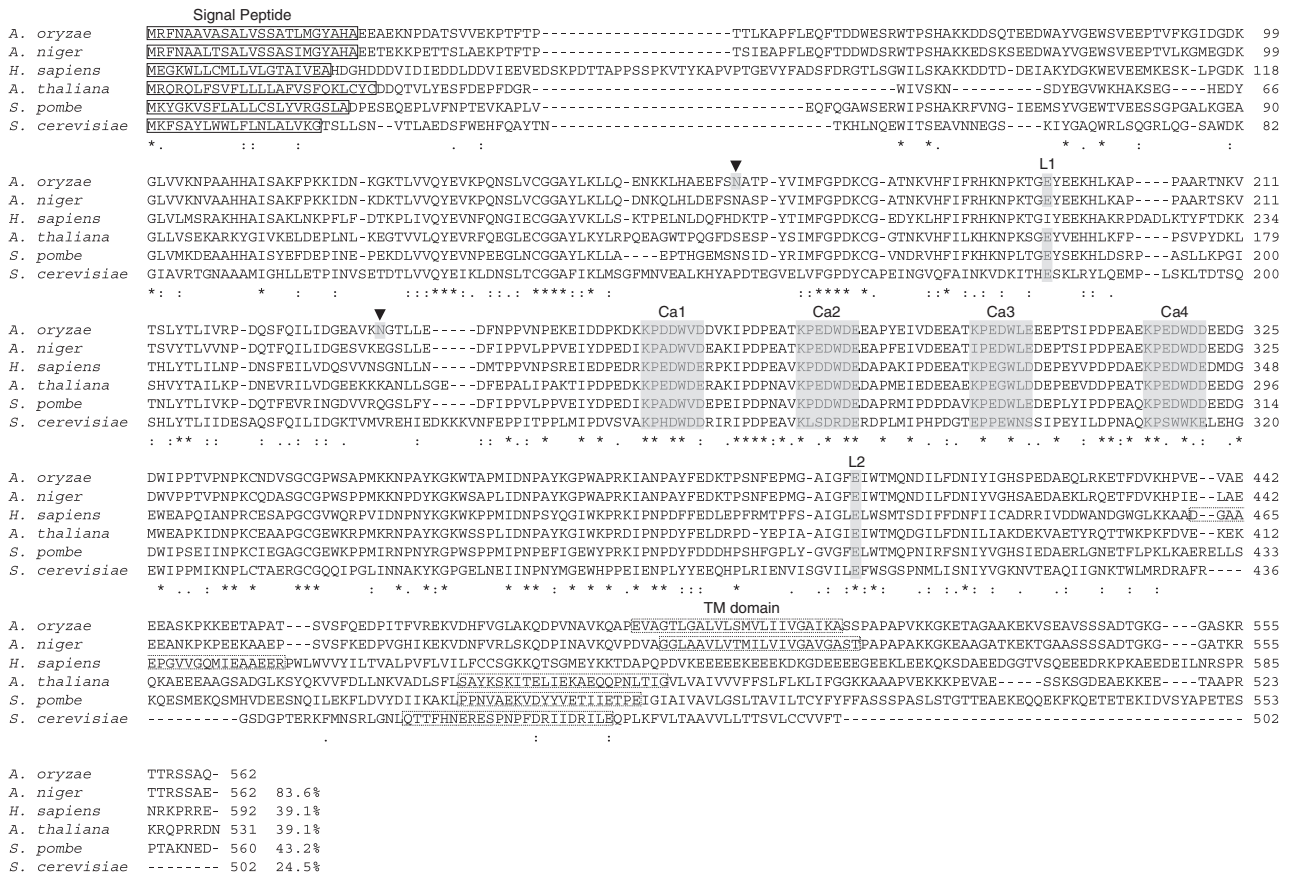

**Fig. 3.** Alignment of Amino Acid Sequences of AoClx and Calnexins from *A. niger*, *H. sapiens*, *A. thaliana*, *S. pombe*, and *S. cerevisiae*. The alignment was generated with the ClustalW program. The predicted signal peptide sequences are shown in the open box. The vertical arrowheads indicate the deduced N-glycosylation site. Two conserved calnexin lectin sites, L1 and L2,<sup>35</sup> are shaded in gray. Four calcium binding motifs (Ca1–Ca4) are shown in gray. The TM domain indicates the transmembrane domain (open boxes enclosed by dashed lines).

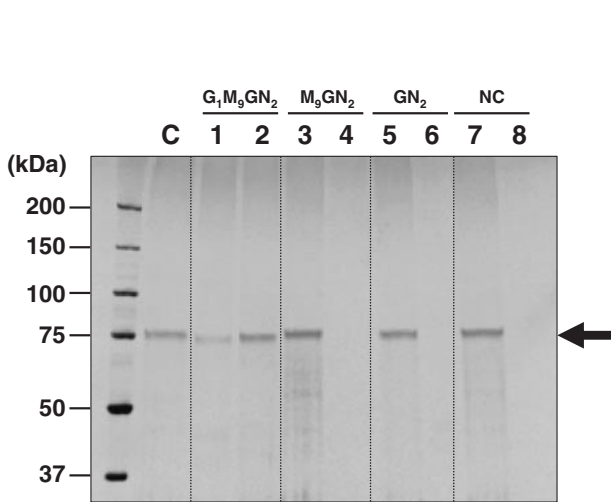

**Fig. 4.** Binding Analysis of the AoClx Protein with N-Glycan-Conjugated Beads.

The 75-kDa protein captured in the Glc<sub>1</sub>Man<sub>9</sub>GlcNAc<sub>2</sub>-conjugated beads (lane C) was subjected to another affinity chromatographic experiment using beads conjugated with Glc<sub>1</sub>Man<sub>9</sub>GlcNAc<sub>2</sub> (G<sub>1</sub>M<sub>9</sub>GN<sub>2</sub>, lanes 1 and 2), Man<sub>9</sub>GlcNAc<sub>2</sub> (M<sub>9</sub>GN<sub>2</sub>, lanes 3 and 4), GlcNAc<sub>2</sub> (GN<sub>2</sub>, lanes 5 and 6), and NC (non-conjugated, lanes 7 and 8). Lanes: 1, 3, 5, and 7, wash fractions; 2, 4, 6, and 8, elution fractions.

*A. niger*,<sup>32</sup> its binding specificity to N-glycans has not been studied. This paper provides the first evidence for lectin activity and the specific binding of calnexin to Glc<sub>1</sub>Man<sub>9</sub>GlcNAc<sub>2</sub> from filamentous fungi. On the other hand, though it has been suggested that yeast calnexin plays a part in glycoprotein quality control,<sup>41–44</sup> its binding specificity to N-glycan has not yet been reported. Using the Glc<sub>1</sub>Man<sub>9</sub>GlcNAc<sub>2</sub>-conjugated beads, calnexin could not be isolated from *S. cerevisiae* (data not shown). The ER in *A. oryzae* develops a large network as compared with yeast,<sup>28</sup> and the capacity of protein secretion in filamentous fungi such as *A. oryzae* is higher than in yeast.<sup>4</sup> Therefore, it is suggested that *A. oryzae* may be a good model for biological analysis of glycoprotein quality control in the ER.

In filamentous fungi, a correlation between glycoprotein quality control and protein production has been suggested. In a cellulolytic filamentous fungus, *Trichoderma reesei*, impairment in glucosidase II activity caused efficient protein secretion.<sup>20</sup> Overexpression of calnexin in *A. niger* resulted in higher production of a fungal protein, manganese peroxidase, from the white rot basidiomycete *Phanerochaete chrysosporium*.<sup>19</sup> These results suggest that glycoprotein quality control

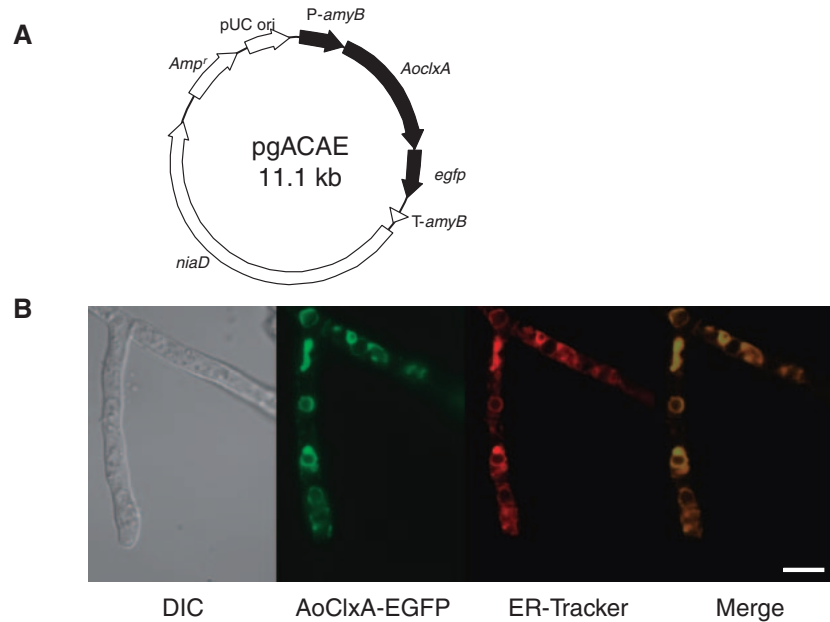

**Fig. 5.** Localization Analysis of the AoClx A Protein in *A. oryzae*.

A, Expression plasmid for the AoClx A-EGFP fusion protein. B, Localization of the AoClx A-EGFP fusion protein in *A. oryzae*. Hyphae expressing the AoClx A-EGFP fusion protein were observed by fluorescence microscopy. The strain was stained with ER-Tracker Blue-White DPX. The two fluorescent images were merged (AoClx A-EGFP: green, ER-Tracker: red), showing their co-localization in yellow. Bar, 10  $\mu$ m.

can affect protein production, but the molecular machinery of glycoprotein quality control is largely unknown in filamentous fungi. In this study, the use of the *N*-glycan-conjugated beads allowed us to isolate a lectin from the membranous fraction, including the ER of *A. oryzae*. Hence it is suggested that the use of synthetic *N*-glycan-conjugated beads is a powerful strategy to screen for proteins with lectin activity from the ER, one that might provide not only a breakthrough in the improvement of heterologous protein production by filamentous fungi, but also new knowledge of the lectin-like proteins involved in glycoprotein degradation.

## Acknowledgment

Financial support from the Ministry of Education, Culture, Sports, Science and Technology of Japan (a Grant-in-Aid for the Encouragement of Young Scientists, No. 15780220) and the Chemical Biology program of RIKEN are acknowledged. We are grateful for the support of BSI's Research Resources Center for LC-MS/MS analysis. We thank Ms. Yukiko Oshima for localization analysis and Ms. Akemi Takahashi for technical assistance.

## References

- 1) Kitamoto, K., Molecular biology of the Koji molds. *Adv. Appl. Microbiol.*, **51**, 129–153 (2002).
- 2) Gouka, R. J., Punt, P. J., and van den Hondel, C. A., Efficient production of secreted proteins by *Aspergillus*: progress, limitations and prospects. *Appl. Microbiol. Biotechnol.*, **47**, 1–11 (1997).
- 3) Archer, D. B., Filamentous fungi as microbial cell factories for food use. *Curr. Opin. Biotechnol.*, **11**, 478–483 (2000).
- 4) Punt, P. J., van Biezen, N., Conesa, A., Albers, A., Magnus, J., and van den Hondel, C. A., Filamentous fungi as cell factories for heterologous protein production. *Trends Biotechnol.*, **20**, 200–206 (2002).
- 5) Helenius, A., and Aebi, M., Roles of *N*-linked glycans in the endoplasmic reticulum. *Annu. Rev. Biochem.*, **73**, 1019–1049 (2004).
- 6) Williams, D. B., Beyond lectins: the calnexin/calreticulin chaperone system of the endoplasmic reticulum. *J. Cell Sci.*, **119**, 615–623 (2006).
- 7) Paquet, M. E., Leach, M. R., and Williams, D. B., *In vitro* and *in vivo* assays to assess the functions of calnexin and calreticulin in ER protein folding and quality control. *Methods*, **35**, 338–347 (2005).
- 8) Leach, M. R., Cohen-Doyle, M. F., Thomas, D. Y., and Williams, D. B., Localization of the lectin, ERp57 binding, and polypeptide binding sites of calnexin and calreticulin. *J. Biol. Chem.*, **277**, 29686–29697 (2002).
- 9) Trombetta, E. S., and Parodi, A. J., Glycoprotein reglucosylation. *Methods*, **35**, 328–337 (2005).
- 10) Oda, Y., Hosokawa, N., Wada, I., and Nagata, K., EDEM as an acceptor of terminally misfolded glycoproteins released from calnexin. *Science*, **299**, 1394–1397 (2003).
- 11) Molinari, M., Calance, V., Galli, C., Lucca, P., and Paganetti, P., Role of EDEM in the release of misfolded glycoproteins from the calnexin cycle. *Science*, **299**, 1397–1400 (2003).
- 12) Szathmary, R., Biemann, R., Nita-Lazar, M., Burda, P.,

- and Jakob, C. A., Yos9 protein is essential for degradation of misfolded glycoproteins and may function as lectin in ERAD. *Mol. Cell*, **19**, 765–775 (2005).
- 13) Matsuo, I., and Ito, Y., Synthesis of an octamannosylated glycan chain, the key oligosaccharide structure in ER-associated degradation. *Carbohydr. Res.*, **338**, 2163–2168 (2003).
  - 14) Matsuo, I., Wada, M., Manabe, S., Yamaguchi, Y., Otake, K., Kato, K., and Ito, Y., Synthesis of mono-glucosylated high-mannose-type dodecasaccharide, a putative ligand for molecular chaperone, calnexin, and calreticulin. *J. Am. Chem. Soc.*, **125**, 3402–3403 (2003).
  - 15) Matsuo, I., Kashiwagi, T., Totani, K., and Ito, Y., First chemical synthesis of triglucosylated tetradecasaccharide (Glc<sub>3</sub>Man<sub>9</sub>GlcNAc<sub>2</sub>), a common precursor of asparagine-linked oligosaccharides. *Tetrahedron Lett.*, **46**, 4197–4200 (2005).
  - 16) Matsuo, I., Totani, K., Tatami, A., and Ito, Y., Comprehensive synthesis of ER related high-mannose-type sugar chains by convergent strategy. *Tetrahedron*, **62**, 8262–8277 (2006).
  - 17) Totani, K., Ihara, Y., Matsuo, I., Koshino, H., and Ito, Y., Synthetic substrates for an endoplasmic reticulum protein-folding sensor, UDP-glucose: glycoprotein glucosyltransferase. *Angew. Chem. Int. Ed. Engl.*, **44**, 7950–7954 (2005).
  - 18) Totani, K., Ihara, Y., Matsuo, I., and Ito, Y., Substrate specificity analysis of endoplasmic reticulum glucosidase II using synthetic high mannose-type glycans. *J. Biol. Chem.*, **281**, 31502–31508 (2006).
  - 19) Conesa, A., Jeenes, D., Archer, D. B., van den Hondel, C. A., and Punt, P. J., Calnexin overexpression increases manganese peroxidase production in *Aspergillus niger*. *Appl. Environ. Microbiol.*, **68**, 846–851 (2002).
  - 20) Geysens, S., Pakula, T., Uusitalo, J., Dewerte, I., Penttila, M., and Contreras, R., Cloning and characterization of the glucosidase II alpha subunit gene of *Trichoderma reesei*: a frameshift mutation results in the aberrant glycosylation profile of the hypercellulolytic strain Rut-C30. *Appl. Environ. Microbiol.*, **71**, 2910–2924 (2005).
  - 21) Totani, K., Matsuo, I., Ihara, Y., and Ito, Y., High-mannose-type glycan modifications of dihydrofolate reductase using glycan-methotrexate conjugates. *Bioorg. Med. Chem.*, **14**, 5220–5229 (2006).
  - 22) Ellman, G. L., Tissue sulfhydryl groups. *Arch. Biochem. Biophys.*, **82**, 70–77 (1959).
  - 23) Shevchenko, A., Wilm, M., Vorm, O., and Mann, M., Mass spectrometric sequencing of proteins silver-stained polyacrylamide gels. *Anal. Chem.*, **68**, 850–858 (1996).
  - 24) Perkins, D. N., Pappin, D. J., Creasy, D. M., and Cottrell, J. S., Probability-based protein identification by searching sequence databases using mass spectrometry data. *Electrophoresis*, **20**, 3551–3567 (1999).
  - 25) Mabashi, Y., Kikuma, T., Maruyama, J., Arioka, M., and Kitamoto, K., Development of a versatile expression plasmid construction system for *Aspergillus oryzae* and its application to visualization of mitochondria. *Biosci. Biotechnol. Biochem.*, **70**, 1882–1889 (2006).
  - 26) Yamada, O., Lee, B. R., and Gomi, K., Transformation system for *Aspergillus oryzae* with double auxotrophic mutations, *niaD* and *sC*. *Biosci. Biotechnol. Biochem.*, **61**, 1367–1369 (1997).
  - 27) Ware, F. E., Vassilakos, A., Peterson, P. A., Jackson, M. R., Lehrman, M. A., and Williams, D. B., The molecular chaperone calnexin binds Glc<sub>1</sub>Man<sub>9</sub>GlcNAc<sub>2</sub> oligosaccharide as an initial step in recognizing unfolded glycoproteins. *J. Biol. Chem.*, **270**, 4697–4704 (1995).
  - 28) Maruyama, J., Kikuchi, S., and Kitamoto, K., Differential distribution of the endoplasmic reticulum network as visualized by the BipA-EGFP fusion protein in hyphal compartments across the septum of the filamentous fungus, *Aspergillus oryzae*. *Fungal Genet. Biol.*, **43**, 642–654 (2006).
  - 29) Arai, M. A., Matsuo, I., Hagihara, S., Totani, K., Maruyama, J., Kitamoto, K., and Ito, Y., Design and synthesis of oligosaccharides that interfere with glycoprotein quality-control systems. *ChemBiochem*, **6**, 2281–2289 (2005).
  - 30) Jannatipour, M., and Rokeach, L. A., The *Schizosaccharomyces pombe* homologue of the chaperone calnexin is essential for viability. *J. Biol. Chem.*, **270**, 4845–4853 (1995).
  - 31) Parlati, F., Dignard, D., Bergeron, J. J., and Thomas, D. Y., The calnexin homologue *cnx1<sup>+</sup>* in *Schizosaccharomyces pombe*, is an essential gene which can be complemented by its soluble ER domain. *EMBO J.*, **14**, 3064–3072 (1995).
  - 32) Wang, H., Entwistle, J., Morlon, E., Archer, D. B., Peberdy, J. F., Ward, M., and Jeenes, D. J., Isolation and characterisation of a calnexin homologue, *clxA*, from *Aspergillus niger*. *Mol. Genet. Genomics*, **268**, 684–691 (2003).
  - 33) Spiro, R. G., Zhu, Q., Bhojroo, V., and Soling, H. D., Definition of the lectin-like properties of the molecular chaperone, calreticulin, and demonstration of its copurification with endomannosidase from rat liver Golgi. *J. Biol. Chem.*, **271**, 11588–11594 (1996).
  - 34) Vassilakos, A., Michalak, M., Lehrman, M. A., and Williams, D. B., Oligosaccharide binding characteristics of the molecular chaperones calnexin and calreticulin. *Biochemistry*, **37**, 3480–3490 (1998).
  - 35) Schrag, J. D., Bergeron, J. J., Li, Y., Borisova, S., Hahn, M., Thomas, D. Y., and Cygler, M., The Structure of calnexin, an ER chaperone involved in quality control of protein folding. *Mol. Cell*, **8**, 633–644 (2001).
  - 36) Corbett, E. F., and Michalak, M., Calcium, a signaling molecule in the endoplasmic reticulum? *Trends Biochem. Sci.*, **25**, 307–311 (2000).
  - 37) Gurr, S. J., Unkles, S. E., and Kinghorn, J. R., The structure and organisation of nuclear genes in filamentous fungi. In “Gene Structure in Eukaryotic Microbes,” ed. Kinghorn, J. R., IRL Press, Oxford, pp. 93–139 (1987).
  - 38) Mulder, H. J., Nikolaev, I., and Madrid, S. M., HACA, the transcriptional activator of the unfolded protein response (UPR) in *Aspergillus niger*, binds to partly palindromic UPR elements of the consensus sequence 5'-CAN(G/A)NTGT/GCCT-3'. *Fungal Genet. Biol.*, **43**, 560–572 (2006).
  - 39) Ito, Y., Hagihara, S., Matsuo, I., and Totani, K., Structural approaches to the study of oligosaccharides in glycoprotein quality control. *Curr. Opin. Struct. Biol.*, **15**, 481–489 (2005).
  - 40) Hagihara, S., Totani, K., Matsuo, I., and Ito, Y., Thermodynamic analysis of interactions between N-



- linked sugar chains and F-box protein Fbs1. *J. Med. Chem.*, **48**, 3126–3129 (2005).
- 41) Xu, X., Azakami, H., and Kato, A., P-domain and lectin site are involved in the chaperone function of *Saccharomyces cerevisiae* calnexin homologue. *FEBS Lett.*, **570**, 155–160 (2004).
- 42) Song, Y., Azakami, H., Shamima, B., He, J., and Kato, A., Different effects of calnexin deletion in *Saccharomyces cerevisiae* on the secretion of two glycosylated amyloidogenic lysozymes. *FEBS Lett.*, **512**, 213–217 (2002).
- 43) Song, Y., Sata, J., Saito, A., Usui, M., Azakami, H., and Kato, A., Effects of calnexin deletion in *Saccharomyces cerevisiae* on the secretion of glycosylated lysozymes. *J. Biochem.*, **130**, 757–764 (2001).
- 44) Parodi, A. J., Reglucosylation of glycoproteins and quality control of glycoprotein folding in the endoplasmic reticulum of yeast cells. *Biochim. Biophys. Acta*, **1426**, 287–295 (1999).
